# Supplementary material
Source: MDPI journal article supplement (https://www.mdpi.com/2073-4441/13/2/111)

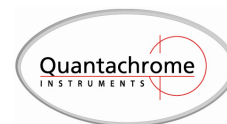

# Analysis

Operator: operator  
Sample ID: TS63-02-108-001  
Sample Desc:  
Sample weight: 0.7145 g  
Analysis Time: 208.8 min  
Void Vol.: He Mode.Cell: 9mm large bulb  
Cold Zone Vol.: 26.0987  
Thermal delay: 600 sec  
Outgas Time: 6.0 hrs  
Analysis gas: Nitrogen  
Press. Tolerance: 0.050/0.050 (ads/des)

Date:7/9/2020

Filename:  
Comment:

# Report

Operator: operator  
QW1\_200709\_01.qps

Date:2020/07/10

End of run: 7/9/2020 19:18:39  
Run mode: Standard  
Warm Zone Vol.: 13.0621  
He evac time: 10 min  
OutgasTemp: 300.0 C  
Bath Temp: 77.3 K  
Equil time: 200/200 sec (ads/des)

Instrument: QuadraSorb Station 1  
Instrument version: 6.00

Equil timeout: 400/400 sec (ads/des)

## Isotherm : Linear

### Data Reduction Parameters

#### Adsorbate

Nitrogen  
Molec. Wt.: 28.013

Temperature 77.350K  
Cross Section: 16.200 Å²

Liquid Density: 0.808 g/cc

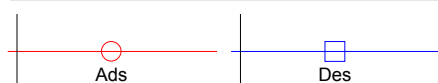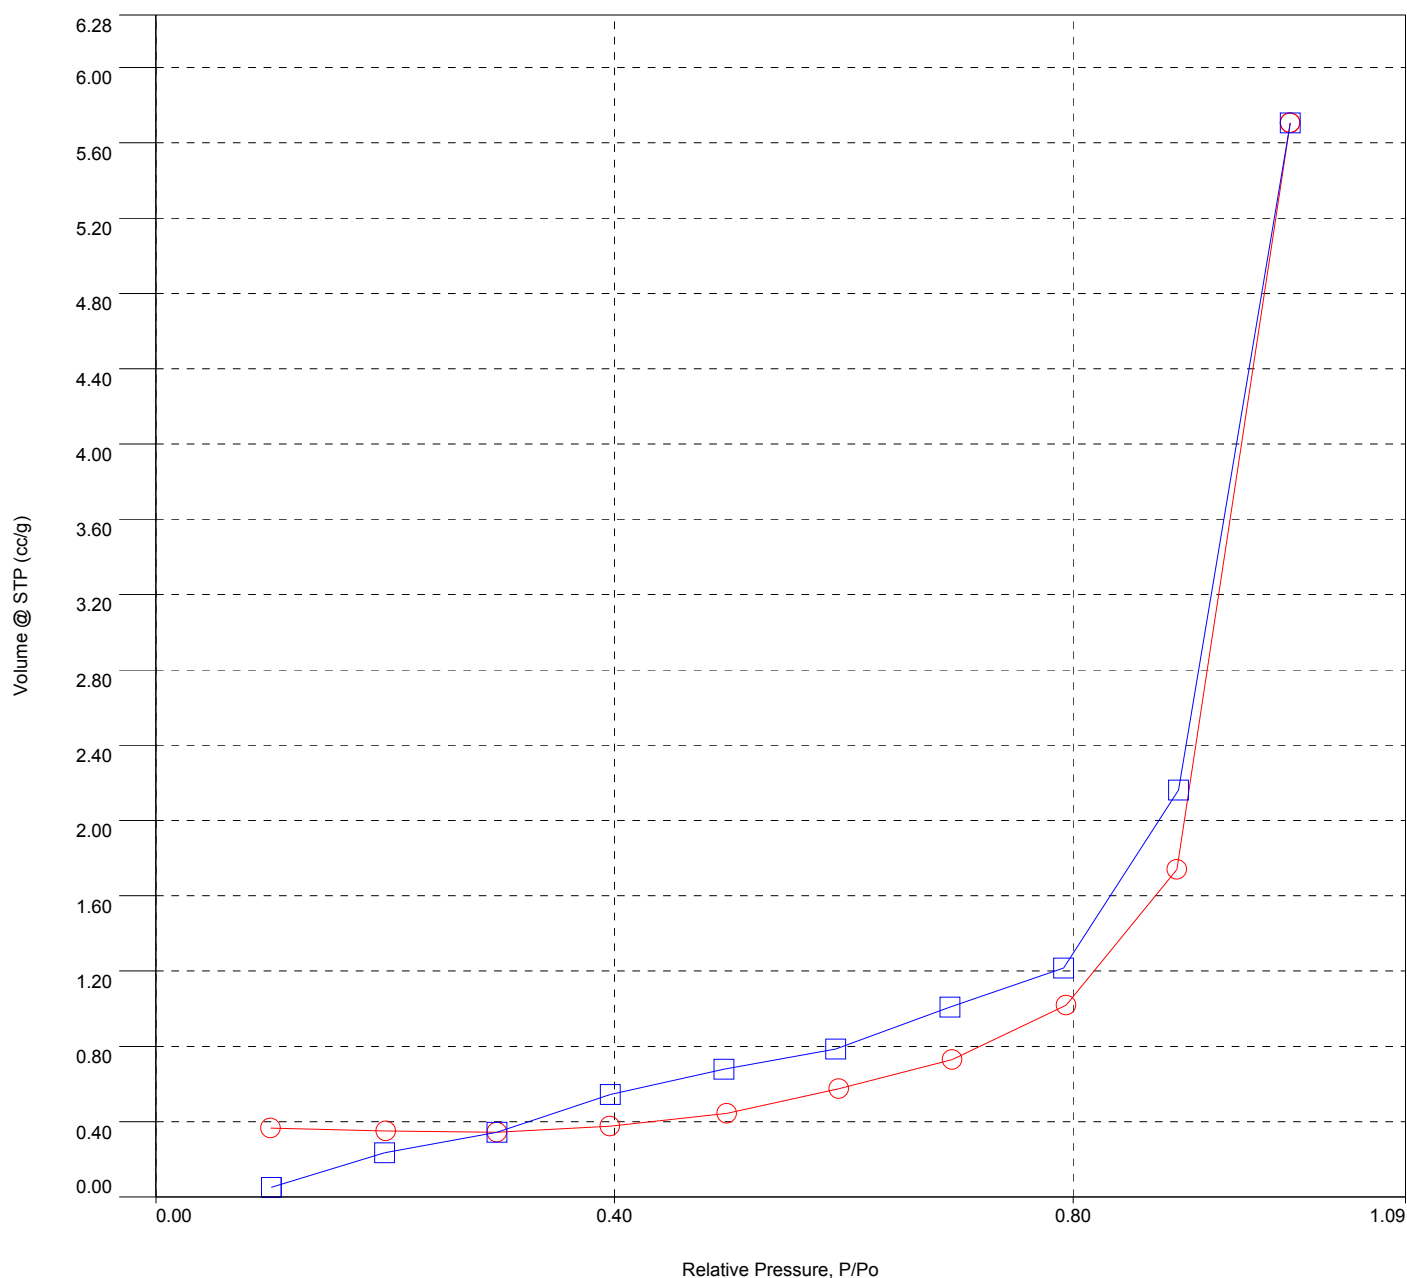

Supplement: s1 [file s1]
